# Supplementary material for: Irradiation by a Combination of Different Peak-Wavelength Ultraviolet-Light Emitting Diodes Enhances the Inactivation of Influenza A Viruses
Source: PubMed Central journal article supplement (PMC7409356; doi:10.3390/microorganisms8071014), 2020-07-08
Supplement: microorganisms-08-01014-s001.pdf [file microorganisms-08-01014-s001.pdf]

**Supplementary Materials**
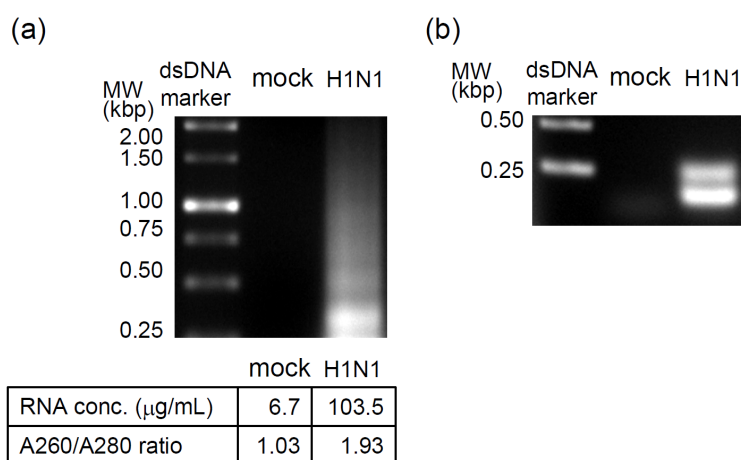

**Figure S1.** Purification of viral RNA from allantoic fluids of mock- or H1N1 IAV-infected chicken embryonated eggs. The viral RNA was checked by agarose gel electrophoresis for 20  $\mu\text{L}$  purified samples (a) and RT-PCR products for segment 4 (b), as described in Materials and Methods. Any pellets after ultracentrifusion and enough RNA concentration for gel electrophoresis were not observed in the mock-infected sample.
